# Supplementary material
Source: MDPI journal article supplement (https://www.mdpi.com/2076-3387/12/4/124)
Supplement: s1 [file s1]

**Supplementary. Types of Necessary Knowledge and Analysis of Competencies****Table S1. Types of Necessary Knowledge by Country**

| Types of knowledge necessary for tasks and responsibilities the accountant should fulfil during every day work |                                       | country   |        | Total  |
|----------------------------------------------------------------------------------------------------------------|---------------------------------------|-----------|--------|--------|
|                                                                                                                |                                       | Lithuania | Latvia |        |
| Financial accounting_no                                                                                        | Count                                 | 7         | 1      | 8      |
|                                                                                                                | % within Types of necessary knowledge | 87.5%     | 12.5%  | 100.0% |
|                                                                                                                | % within country                      | 3.8%      | 0.5%   | 2.1%   |
|                                                                                                                | % of Total                            | 1.8%      | 0.3%   | 2.1%   |
| Financial accounting_yes                                                                                       | Count                                 | 175       | 204    | 379    |
|                                                                                                                | % within Types of necessary knowledge | 46.2%     | 53.8%  | 100.0% |
|                                                                                                                | % within country                      | 96.2%     | 99.5%  | 97.9%  |
|                                                                                                                | % of Total                            | 45.2%     | 52.7%  | 97.9%  |
| Total                                                                                                          | Count                                 | 182       | 205    | 387    |
|                                                                                                                | % within Types of necessary knowledge | 47.0%     | 53.0%  | 100.0% |
|                                                                                                                | % within country                      | 100.0%    | 100.0% | 100.0% |
|                                                                                                                | % of Total                            | 47.0%     | 53.0%  | 100.0% |
| External reporting_no                                                                                          | Count                                 | 29        | 3      | 32     |
|                                                                                                                | % within Types of necessary knowledge | 90.6%     | 9.4%   | 100.0% |
|                                                                                                                | % within country                      | 15.9%     | 1.5%   | 8.3%   |
|                                                                                                                | % of Total                            | 7.5%      | 0.8%   | 8.3%   |
| External reporting_yes                                                                                         | Count                                 | 153       | 202    | 355    |
|                                                                                                                | % within Types of necessary knowledge | 43.1%     | 56.9%  | 100.0% |
|                                                                                                                | % within country                      | 84.1%     | 98.5%  | 91.7%  |
|                                                                                                                | % of Total                            | 39.5%     | 52.2%  | 91.7%  |
| Total                                                                                                          | Count                                 | 182       | 205    | 387    |
|                                                                                                                | % within Types of necessary knowledge | 47.0%     | 53.0%  | 100.0% |
|                                                                                                                | % within country                      | 100.0%    | 100.0% | 100.0% |
|                                                                                                                | % of Total                            | 47.0%     | 53.0%  | 100.0% |
| Calculation and accounting of taxes_no                                                                         | Count                                 | 38        | 2      | 40     |
|                                                                                                                | % within Types of necessary knowledge | 95.0%     | 5.0%   | 100.0% |
|                                                                                                                | % within country                      | 20.9%     | 1.0%   | 10.3%  |
|                                                                                                                | % of Total                            | 9.8%      | 0.5%   | 10.3%  |
|                                                                                                                | Count                                 | 144       | 203    | 347    |

| Types of knowledge necessary for tasks and responsibilities the accountant should fulfil during every day work |                                       | country   |        | Total  |
|----------------------------------------------------------------------------------------------------------------|---------------------------------------|-----------|--------|--------|
|                                                                                                                |                                       | Lithuania | Latvia |        |
| Calculation and accounting of taxes_yes                                                                        | % within Types of necessary knowledge | 41.5%     | 58.5%  | 100.0% |
|                                                                                                                | % within country                      | 79.1%     | 99.0%  | 89.7%  |
|                                                                                                                | % of Total                            | 37.2%     | 52.5%  | 89.7%  |
| Total                                                                                                          | Count                                 | 182       | 205    | 387    |
|                                                                                                                | % within Types of necessary knowledge | 47.0%     | 53.0%  | 100.0% |
|                                                                                                                | % within country                      | 100.0%    | 100.0% | 100.0% |
|                                                                                                                | % of Total                            | 47.0%     | 53.0%  | 100.0% |
| Payroll accounting_no                                                                                          | Count                                 | 47        | 4      | 51     |
|                                                                                                                | % within Types of necessary knowledge | 92.2%     | 7.8%   | 100.0% |
|                                                                                                                | % within country                      | 25.8%     | 2.0%   | 13.2%  |
|                                                                                                                | % of Total                            | 12.1%     | 1.0%   | 13.2%  |
| Payroll accounting_yes                                                                                         | Count                                 | 135       | 201    | 336    |
|                                                                                                                | % within Types of necessary knowledge | 40.2%     | 59.8%  | 100.0% |
|                                                                                                                | % within country                      | 74.2%     | 98.0%  | 86.8%  |
|                                                                                                                | % of Total                            | 34.9%     | 51.9%  | 86.8%  |
| Total                                                                                                          | Count                                 | 182       | 205    | 387    |
|                                                                                                                | % within Types of necessary knowledge | 47.0%     | 53.0%  | 100.0% |
|                                                                                                                | % within country                      | 100.0%    | 100.0% | 100.0% |
|                                                                                                                | % of Total                            | 47.0%     | 53.0%  | 100.0% |
| Managerial accounting_no                                                                                       | Count                                 | 121       | 53     | 174    |
|                                                                                                                | % within Types of necessary knowledge | 69.5%     | 30.5%  | 100.0% |
|                                                                                                                | % within country                      | 66.5%     | 25.9%  | 45.0%  |
|                                                                                                                | % of Total                            | 31.3%     | 13.7%  | 45.0%  |
| Managerial accounting_yes                                                                                      | Count                                 | 61        | 152    | 213    |
|                                                                                                                | % within Types of necessary knowledge | 28.6%     | 71.4%  | 100.0% |
|                                                                                                                | % within country                      | 33.5%     | 74.1%  | 55.0%  |
|                                                                                                                | % of Total                            | 15.8%     | 39.3%  | 55.0%  |
| Total                                                                                                          | Count                                 | 182       | 205    | 387    |
|                                                                                                                | % within Types of necessary knowledge | 47.0%     | 53.0%  | 100.0% |
|                                                                                                                | % within country                      | 100.0%    | 100.0% | 100.0% |
|                                                                                                                | % of Total                            | 47.0%     | 53.0%  | 100.0% |
|                                                                                                                | Count                                 | 75        | 48     | 123    |

| Types of knowledge necessary for tasks and responsibilities the accountant should fulfil during every day work |                                       | country   |        | Total  |
|----------------------------------------------------------------------------------------------------------------|---------------------------------------|-----------|--------|--------|
|                                                                                                                |                                       | Lithuania | Latvia |        |
| Financial analysis_no                                                                                          | % within Types of necessary knowledge | 61.0%     | 39.0%  | 100.0% |
|                                                                                                                | % within country                      | 41.2%     | 23.4%  | 31.8%  |
|                                                                                                                | % of Total                            | 19.4%     | 12.4%  | 31.8%  |
| Financial analysis_yes                                                                                         | Count                                 | 107       | 157    | 264    |
|                                                                                                                | % within Types of necessary knowledge | 40.5%     | 59.5%  | 100.0% |
|                                                                                                                | % within country                      | 58.8%     | 76.6%  | 68.2%  |
|                                                                                                                | % of Total                            | 27.6%     | 40.6%  | 68.2%  |
| Total                                                                                                          | Count                                 | 182       | 205    | 387    |
|                                                                                                                | % within Types of necessary knowledge | 47.0%     | 53.0%  | 100.0% |
|                                                                                                                | % within country                      | 100.0%    | 100.0% | 100.0% |
|                                                                                                                | % of Total                            | 47.0%     | 53.0%  | 100.0% |
| Activities related to the management decision-making process_no                                                | Count                                 | 126       | 49     | 175    |
|                                                                                                                | % within Types of necessary knowledge | 72.0%     | 28.0%  | 100.0% |
|                                                                                                                | % within country                      | 69.2%     | 23.9%  | 45.2%  |
|                                                                                                                | % of Total                            | 32.6%     | 12.7%  | 45.2%  |
| Activities related to the management decision-making process_yes                                               | Count                                 | 56        | 156    | 212    |
|                                                                                                                | % within Types of necessary knowledge | 26.4%     | 73.6%  | 100.0% |
|                                                                                                                | % within country                      | 30.8%     | 76.1%  | 54.8%  |
|                                                                                                                | % of Total                            | 14.5%     | 40.3%  | 54.8%  |
| Total                                                                                                          | Count                                 | 182       | 205    | 387    |
|                                                                                                                | % within Types of necessary knowledge | 47.0%     | 53.0%  | 100.0% |
|                                                                                                                | % within country                      | 100.0%    | 100.0% | 100.0% |
|                                                                                                                | % of Total                            | 47.0%     | 53.0%  | 100.0% |
| Knowledge of laws and legislation_no                                                                           | Count                                 | 88        | 1      | 89     |
|                                                                                                                | % within Types of necessary knowledge | 98.9%     | 1.1%   | 100.0% |
|                                                                                                                | % within country                      | 48.4%     | .5%    | 23.0%  |
|                                                                                                                | % of Total                            | 22.7%     | .3%    | 23.0%  |
| Knowledge of laws and legislation_yes                                                                          | Count                                 | 94        | 204    | 298    |
|                                                                                                                | % within Types of necessary knowledge | 31.5%     | 68.5%  | 100.0% |
|                                                                                                                | % within country                      | 51.6%     | 99.5%  | 77.0%  |
|                                                                                                                | % of Total                            | 24.3%     | 52.7%  | 77.0%  |
| Total                                                                                                          | Count                                 | 182       | 205    | 387    |

| Types of knowledge necessary for tasks and responsibilities the accountant should fulfil during every day work |                                       | country   |        | Total  |
|----------------------------------------------------------------------------------------------------------------|---------------------------------------|-----------|--------|--------|
|                                                                                                                |                                       | Lithuania | Latvia |        |
|                                                                                                                | % within Types of necessary knowledge | 47.0%     | 53.0%  | 100.0% |
|                                                                                                                | % within country                      | 100.0%    | 100.0% | 100.0% |
|                                                                                                                | % of Total                            | 47.0%     | 53.0%  | 100.0% |
|                                                                                                                |                                       |           |        |        |
| Knowledge of IT related_no                                                                                     | Count                                 | 75        | 40     | 115    |
|                                                                                                                | % within Types of necessary knowledge | 65.2%     | 34.8%  | 100.0% |
|                                                                                                                | % within country                      | 41.2%     | 19.5%  | 29.7%  |
|                                                                                                                | % of Total                            | 19.4%     | 10.3%  | 29.7%  |
| Knowledge of IT related_yes                                                                                    | Count                                 | 107       | 165    | 272    |
|                                                                                                                | % within Types of necessary knowledge | 39.3%     | 60.7%  | 100.0% |
|                                                                                                                | % within country                      | 58.8%     | 80.5%  | 70.3%  |
|                                                                                                                | % of Total                            | 27.6%     | 42.6%  | 70.3%  |
| Total                                                                                                          | Count                                 | 182       | 205    | 387    |
|                                                                                                                | % within Types of necessary knowledge | 47.0%     | 53.0%  | 100.0% |
|                                                                                                                | % within country                      | 100.0%    | 100.0% | 100.0% |
|                                                                                                                | % of Total                            | 47.0%     | 53.0%  | 100.0% |

**Table S2.** Knowledge, Indirectly Related to the Profession by Country

| Types of knowledge necessary for tasks and responsibilities the accountant should fulfil during every day work |                                       | country   |        | Total  |
|----------------------------------------------------------------------------------------------------------------|---------------------------------------|-----------|--------|--------|
|                                                                                                                |                                       | Lithuania | Latvia |        |
| Environmental accounting_no                                                                                    | Count                                 | 147       | 125    | 272    |
|                                                                                                                | % within Types of necessary knowledge | 54.0%     | 46.0%  | 100.0% |
|                                                                                                                | % within country                      | 80.8%     | 61.0%  | 70.3%  |
|                                                                                                                | % of Total                            | 38.0%     | 32.3%  | 70.3%  |
| Environmental accounting_yes                                                                                   | Count                                 | 35        | 80     | 115    |
|                                                                                                                | % within Types of necessary knowledge | 30.4%     | 69.6%  | 100.0% |
|                                                                                                                | % within country                      | 19.2%     | 39.0%  | 29.7%  |
|                                                                                                                | % of Total                            | 9.0%      | 20.7%  | 29.7%  |
| Total                                                                                                          | Count                                 | 182       | 205    | 387    |
|                                                                                                                | % within Types of necessary knowledge | 47.0%     | 53.0%  | 100.0% |
|                                                                                                                | % within country                      | 100.0%    | 100.0% | 100.0% |
|                                                                                                                | % of Total                            | 47.0%     | 53.0%  | 100.0% |

| Types of knowledge necessary for tasks and responsibilities the accountant should fulfil during every day work |                                       | country   |        | Total  |
|----------------------------------------------------------------------------------------------------------------|---------------------------------------|-----------|--------|--------|
|                                                                                                                |                                       | Lithuania | Latvia |        |
| Knowledge of languages_no                                                                                      | Count                                 | 105       | 87     | 192    |
|                                                                                                                | % within Types of necessary knowledge | 54.7%     | 45.3%  | 100.0% |
|                                                                                                                | % within country                      | 57.7%     | 42.6%  | 49.7%  |
|                                                                                                                | % of Total                            | 27.2%     | 22.5%  | 49.7%  |
| Knowledge of languages_yes                                                                                     | Count                                 | 77        | 117    | 194    |
|                                                                                                                | % within Types of necessary knowledge | 39.7%     | 60.3%  | 100.0% |
|                                                                                                                | % within country                      | 42.3%     | 57.4%  | 50.3%  |
|                                                                                                                | % of Total                            | 19.9%     | 30.3%  | 50.3%  |
| Total                                                                                                          | Count                                 | 182       | 204    | 386    |
|                                                                                                                | % within Types of necessary knowledge | 47.2%     | 52.8%  | 100.0% |
|                                                                                                                | % within country                      | 100.0%    | 100.0% | 100.0% |
|                                                                                                                | % of Total                            | 47.2%     | 52.8%  | 100.0% |
| Knowledge of personnel and staff related_no                                                                    | Count                                 | 132       | 84     | 216    |
|                                                                                                                | % within Types of necessary knowledge | 61.1%     | 38.9%  | 100.0% |
|                                                                                                                | % within country                      | 72.5%     | 41.0%  | 55.8%  |
|                                                                                                                | % of Total                            | 34.1%     | 21.7%  | 55.8%  |
| Knowledge of personnel and staff related_yes                                                                   | Count                                 | 50        | 121    | 171    |
|                                                                                                                | % within Types of necessary knowledge | 29.2%     | 70.8%  | 100.0% |
|                                                                                                                | % within country                      | 27.5%     | 59.0%  | 44.2%  |
|                                                                                                                | % of Total                            | 12.9%     | 31.3%  | 44.2%  |
| Total                                                                                                          | Count                                 | 182       | 205    | 387    |
|                                                                                                                | % within Types of necessary knowledge | 47.0%     | 53.0%  | 100.0% |
|                                                                                                                | % within country                      | 100.0%    | 100.0% | 100.0% |
|                                                                                                                | % of Total                            | 47.0%     | 53.0%  | 100.0% |
| Knowledge of management assistant_no                                                                           | Count                                 | 101       | 108    | 209    |
|                                                                                                                | % within Types of necessary knowledge | 48.3%     | 51.7%  | 100.0% |
|                                                                                                                | % within country                      | 55.5%     | 52.7%  | 54.0%  |
|                                                                                                                | % of Total                            | 26.1%     | 27.9%  | 54.0%  |
| Knowledge of management assitant_yes                                                                           | Count                                 | 81        | 97     | 178    |
|                                                                                                                | % within Types of necessary knowledge | 45.5%     | 54.5%  | 100.0% |
|                                                                                                                | % within country                      | 44.5%     | 47.3%  | 46.0%  |
|                                                                                                                | % of Total                            | 20.9%     | 25.1%  | 46.0%  |

| Types of knowledge necessary for tasks and responsibilities the accountant should fulfil during every day work |                                       | country   |        | Total  |
|----------------------------------------------------------------------------------------------------------------|---------------------------------------|-----------|--------|--------|
|                                                                                                                |                                       | Lithuania | Latvia |        |
| Total                                                                                                          | Count                                 | 182       | 205    | 387    |
|                                                                                                                | % within Types of necessary knowledge | 47.0%     | 53.0%  | 100.0% |
|                                                                                                                | % within country                      | 100.0%    | 100.0% | 100.0% |
|                                                                                                                | % of Total                            | 47.0%     | 53.0%  | 100.0% |

**Table S3.** Types of Necessary Knowledge by Category of the Company

| Types of knowledge necessary for tasks and responsibilities the accountant should fulfil during every day work |                                                | Category of the company |        |        |        | Total  |
|----------------------------------------------------------------------------------------------------------------|------------------------------------------------|-------------------------|--------|--------|--------|--------|
|                                                                                                                |                                                | Micro                   | Small  | Medium | Large  |        |
| Financial accounting_no                                                                                        | Count                                          | 0                       | 1      | 6      | 1      | 8      |
|                                                                                                                | % within Types of necessary knowledge          | 0.0%                    | 12.5%  | 75.0%  | 12.5%  | 100.0% |
|                                                                                                                | % within Identify the category of your company | 0.0%                    | 0.8%   | 7.6%   | 1.7%   | 2.1%   |
|                                                                                                                | % of Total                                     | 0.0%                    | 0.3%   | 1.6%   | 0.3%   | 2.1%   |
| Financial accounting_yes                                                                                       | Count                                          | 129                     | 119    | 73     | 58     | 379    |
|                                                                                                                | % within Types of necessary knowledge          | 34.0%                   | 31.4%  | 19.3%  | 15.3%  | 100.0% |
|                                                                                                                | % within Identify the category of your company | 100.0%                  | 99.2%  | 92.4%  | 98.3%  | 97.9%  |
|                                                                                                                | % of Total                                     | 33.3%                   | 30.7%  | 18.9%  | 15.0%  | 97.9%  |
| Total                                                                                                          | Count                                          | 129                     | 120    | 79     | 59     | 387    |
|                                                                                                                | % within Types of necessary knowledge          | 33.3%                   | 31.0%  | 20.4%  | 15.2%  | 100.0% |
|                                                                                                                | % within Identify the category of your company | 100.0%                  | 100.0% | 100.0% | 100.0% | 100.0% |
|                                                                                                                | % of Total                                     | 33.3%                   | 31.0%  | 20.4%  | 15.2%  | 100.0% |
| Payroll accounting_no                                                                                          | Count                                          | 3                       | 12     | 19     | 17     | 51     |
|                                                                                                                | % within Types of necessary knowledge          | 5.9%                    | 23.5%  | 37.3%  | 33.3%  | 100.0% |
|                                                                                                                | % within Identify the category of your company | 2.3%                    | 10.0%  | 24.1%  | 28.8%  | 13.2%  |
|                                                                                                                | % of Total                                     | .8%                     | 3.1%   | 4.9%   | 4.4%   | 13.2%  |
| Payroll accounting_yes                                                                                         | Count                                          | 126                     | 108    | 60     | 42     | 336    |
|                                                                                                                | % within Types of necessary knowledge          | 37.5%                   | 32.1%  | 17.9%  | 12.5%  | 100.0% |

| Types of knowledge necessary for tasks and responsibilities the accountant should fulfil during every day work |                                                | Category of the company |        |        |        | Total  |
|----------------------------------------------------------------------------------------------------------------|------------------------------------------------|-------------------------|--------|--------|--------|--------|
|                                                                                                                |                                                | Micro                   | Small  | Medium | Large  |        |
|                                                                                                                | % within Identify the category of your company | 97.7%                   | 90.0%  | 75.9%  | 71.2%  | 86.8%  |
|                                                                                                                | % of Total                                     | 32.6%                   | 27.9%  | 15.5%  | 10.9%  | 86.8%  |
| Total                                                                                                          | Count                                          | 129                     | 120    | 79     | 59     | 387    |
|                                                                                                                | % within Types of necessary knowledge          | 33.3%                   | 31.0%  | 20.4%  | 15.2%  | 100.0% |
|                                                                                                                | % within Identify the category of your company | 100.0%                  | 100.0% | 100.0% | 100.0% | 100.0% |
|                                                                                                                | % of Total                                     | 33.3%                   | 31.0%  | 20.4%  | 15.2%  | 100.0% |
| External reporting_no                                                                                          | Count                                          | 2                       | 6      | 15     | 9      | 32     |
|                                                                                                                | % within Types of necessary knowledge          | 6.3%                    | 18.8%  | 46.9%  | 28.1%  | 100.0% |
|                                                                                                                | % within Identify the category of your company | 1.6%                    | 5.0%   | 19.0%  | 15.3%  | 8.3%   |
|                                                                                                                | % of Total                                     | .5%                     | 1.6%   | 3.9%   | 2.3%   | 8.3%   |
| External reporting_yes                                                                                         | Count                                          | 127                     | 114    | 64     | 50     | 355    |
|                                                                                                                | % within Types of necessary knowledge          | 35.8%                   | 32.1%  | 18.0%  | 14.1%  | 100.0% |
|                                                                                                                | % within Identify the category of your company | 98.4%                   | 95.0%  | 81.0%  | 84.7%  | 91.7%  |
|                                                                                                                | % of Total                                     | 32.8%                   | 29.5%  | 16.5%  | 12.9%  | 91.7%  |
| Total                                                                                                          | Count                                          | 129                     | 120    | 79     | 59     | 387    |
|                                                                                                                | % within Types of necessary knowledge          | 33.3%                   | 31.0%  | 20.4%  | 15.2%  | 100.0% |
|                                                                                                                | % within Identify the category of your company | 100.0%                  | 100.0% | 100.0% | 100.0% | 100.0% |
|                                                                                                                | % of Total                                     | 33.3%                   | 31.0%  | 20.4%  | 15.2%  | 100.0% |
| Calculation and accounting of taxes_no                                                                         | Count                                          | 1                       | 2      | 22     | 15     | 40     |
|                                                                                                                | % within Types of necessary knowledge          | 2.5%                    | 5.0%   | 55.0%  | 37.5%  | 100.0% |
|                                                                                                                | % within Identify the category of your company | .8%                     | 1.7%   | 27.8%  | 25.4%  | 10.3%  |
|                                                                                                                | % of Total                                     | .3%                     | .5%    | 5.7%   | 3.9%   | 10.3%  |
| Calculation and accounting of taxes_yes                                                                        | Count                                          | 128                     | 118    | 57     | 44     | 347    |
|                                                                                                                | % within Types of necessary knowledge          | 36.9%                   | 34.0%  | 16.4%  | 12.7%  | 100.0% |

| Types of knowledge necessary for tasks and responsibilities the accountant should fulfil during every day work |                                                | Category of the company |        |        |        | Total  |
|----------------------------------------------------------------------------------------------------------------|------------------------------------------------|-------------------------|--------|--------|--------|--------|
|                                                                                                                |                                                | Micro                   | Small  | Medium | Large  |        |
|                                                                                                                | % within Identify the category of your company | 99.2%                   | 98.3%  | 72.2%  | 74.6%  | 89.7%  |
|                                                                                                                | % of Total                                     | 33.1%                   | 30.5%  | 14.7%  | 11.4%  | 89.7%  |
| Total                                                                                                          | Count                                          | 129                     | 120    | 79     | 59     | 387    |
|                                                                                                                | % within Types of necessary knowledge          | 33.3%                   | 31.0%  | 20.4%  | 15.2%  | 100.0% |
|                                                                                                                | % within Identify the category of your company | 100.0%                  | 100.0% | 100.0% | 100.0% | 100.0% |
|                                                                                                                | % of Total                                     | 33.3%                   | 31.0%  | 20.4%  | 15.2%  | 100.0% |

**Table S4.** Types of Necessary Knowledge by Current Working Position

| Types of knowledge necessary for tasks and responsibilities the accountant should fulfil during every day work |                                                    | Current working position       |                                                                               |                                              |        | Total  |
|----------------------------------------------------------------------------------------------------------------|----------------------------------------------------|--------------------------------|-------------------------------------------------------------------------------|----------------------------------------------|--------|--------|
|                                                                                                                |                                                    | Accountant in business company | Accountant in state, or municipality organisation, association, or foundation | Accountant in outsourcing accounting company | Other  |        |
| Financial accounting_no                                                                                        | Count                                              | 2                              | 4                                                                             | 1                                            | 1      | 8      |
|                                                                                                                | % within Types of necessary knowledge              | 25.0%                          | 50.0%                                                                         | 12.5%                                        | 12.5%  | 100.0% |
|                                                                                                                | % within Your current status (one answer possible) | 1.6%                           | 6.8%                                                                          | 0.6%                                         | 3.6%   | 2.1%   |
|                                                                                                                | % of Total                                         | .5%                            | 1.0%                                                                          | 0.3%                                         | 0.3%   | 2.1%   |
| Financial accounting_yes                                                                                       | Count                                              | 123                            | 55                                                                            | 174                                          | 27     | 379    |
|                                                                                                                | % within Types of necessary knowledge              | 32.5%                          | 14.50%                                                                        | 45.9%                                        | 7.1%   | 100.0% |
|                                                                                                                | % within Your current status (one answer possible) | 98.4%                          | 93.20%                                                                        | 99.4%                                        | 96.4%  | 97.9%  |
|                                                                                                                | % of Total                                         | 31.8%                          | 14.20%                                                                        | 45.0%                                        | 7.0%   | 97.9%  |
| Total                                                                                                          | Count                                              | 125                            | 59                                                                            | 175                                          | 28     | 387    |
|                                                                                                                | % within Types of necessary knowledge              | 32.3%                          | 15.20%                                                                        | 45.2%                                        | 7.2%   | 100.0% |
|                                                                                                                | % within Your current status (one answer possible) | 100.0%                         | 100.0%                                                                        | 100.0%                                       | 100.0% | 100.0% |
|                                                                                                                | % of Total                                         | 32.3%                          | 15.20%                                                                        | 45.2%                                        | 7.2%   | 100.0% |



| Types of knowledge necessary for tasks and responsibilities the accountant should fulfil during every day work |                                                    | Current working position       |                                                                               |                                              |        | Total  |
|----------------------------------------------------------------------------------------------------------------|----------------------------------------------------|--------------------------------|-------------------------------------------------------------------------------|----------------------------------------------|--------|--------|
|                                                                                                                |                                                    | Accountant in business company | Accountant in state, or municipality organisation, association, or foundation | Accountant in outsourcing accounting company | Other  |        |
| Calculation and accounting of taxes_no                                                                         | Count                                              | 9                              | 19                                                                            | 10                                           | 2      | 40     |
|                                                                                                                | % within Types of necessary knowledge              | 22.5%                          | 47.5%                                                                         | 25.0%                                        | 5.0%   | 100.0% |
|                                                                                                                | % within Your current status (one answer possible) | 7.2%                           | 32.2%                                                                         | 5.7%                                         | 7.1%   | 10.3%  |
|                                                                                                                | % of Total                                         | 2.3%                           | 4.9%                                                                          | 2.6%                                         | 0.5%   | 10.3%  |
| Calculation and accounting of taxes_yes                                                                        | Count                                              | 116                            | 40                                                                            | 165                                          | 26     | 347    |
|                                                                                                                | % within Types of necessary knowledge              | 33.4%                          | 11.5%                                                                         | 47.6%                                        | 7.5%   | 100.0% |
|                                                                                                                | % within Your current status (one answer possible) | 92.8%                          | 67.8%                                                                         | 94.3%                                        | 92.9%  | 89.7%  |
|                                                                                                                | % of Total                                         | 30.0%                          | 10.3%                                                                         | 42.6%                                        | 6.7%   | 89.7%  |
|                                                                                                                | Count                                              | 125                            | 59                                                                            | 175                                          | 28     | 387    |
|                                                                                                                | % within Types of necessary knowledge              | 32.3%                          | 15.2%                                                                         | 45.2%                                        | 7.2%   | 100.0% |
|                                                                                                                | % within Your current status (one answer possible) | 100.0%                         | 100.0%                                                                        | 100.0%                                       | 100.0% | 100.0% |
|                                                                                                                | % of Total                                         | 32.3%                          | 15.2%                                                                         | 45.2%                                        | 7.2%   | 100.0% |
| Payroll accounting_no                                                                                          | Count                                              | 15                             | 12                                                                            | 21                                           | 3      | 51     |
|                                                                                                                | % within Types of necessary knowledge              | 29.4%                          | 23.5%                                                                         | 41.2%                                        | 5.9%   | 100.0% |
|                                                                                                                | % within Your current status (one answer possible) | 12.0%                          | 20.3%                                                                         | 12.0%                                        | 10.7%  | 13.2%  |
|                                                                                                                | % of Total                                         | 3.9%                           | 3.1%                                                                          | 5.4%                                         | 0.8%   | 13.2%  |
| Payroll accounting_yes                                                                                         | Count                                              | 110                            | 47                                                                            | 154                                          | 25     | 336    |
|                                                                                                                | % within Types of necessary knowledge              | 32.7%                          | 14.0%                                                                         | 45.8%                                        | 7.4%   | 100.0% |
|                                                                                                                | % within Your current status (one answer possible) | 88.0%                          | 79.7%                                                                         | 88.0%                                        | 89.3%  | 86.8%  |
|                                                                                                                | % of Total                                         | 28.4%                          | 12.1%                                                                         | 39.8%                                        | 6.5%   | 86.8%  |
|                                                                                                                | Count                                              | 125                            | 59                                                                            | 175                                          | 28     | 387    |
|                                                                                                                | % within Types of necessary knowledge              | 32.3%                          | 15.2%                                                                         | 45.2%                                        | 7.2%   | 100.0% |

| Types of knowledge necessary for tasks and responsibilities the accountant should fulfil during every day work |                                                    | Current working position       |                                                                               |                                              |        | Total  |
|----------------------------------------------------------------------------------------------------------------|----------------------------------------------------|--------------------------------|-------------------------------------------------------------------------------|----------------------------------------------|--------|--------|
|                                                                                                                |                                                    | Accountant in business company | Accountant in state, or municipality organisation, association, or foundation | Accountant in outsourcing accounting company | Other  |        |
|                                                                                                                |                                                    |                                |                                                                               |                                              |        |        |
|                                                                                                                | % within Your current status (one answer possible) | 100.0%                         | 100.0%                                                                        | 100.0%                                       | 100.0% | 100.0% |
|                                                                                                                | % of Total                                         | 32.3%                          | 15.2%                                                                         | 45.2%                                        | 7.2%   | 100.0% |
| External reporting_no                                                                                          | Count                                              | 12                             | 5                                                                             | 13                                           | 2      | 32     |
|                                                                                                                | % within Types of necessary knowledge              | 37.5%                          | 15.6%                                                                         | 40.6%                                        | 6.3%   | 100.0% |
|                                                                                                                | % within Your current status (one answer possible) | 9.6%                           | 8.5%                                                                          | 7.4%                                         | 7.1%   | 8.3%   |
|                                                                                                                | % of Total                                         | 3.1%                           | 1.3%                                                                          | 3.4%                                         | 0.5%   | 8.3%   |
| External reporting_yes                                                                                         | Count                                              | 113                            | 54                                                                            | 162                                          | 26     | 355    |
|                                                                                                                | % within Types of necessary knowledge              | 31.8%                          | 15.2%                                                                         | 45.6%                                        | 7.3%   | 100.0% |
|                                                                                                                | % within Your current status (one answer possible) | 90.4%                          | 91.5%                                                                         | 92.6%                                        | 92.9%  | 91.7%  |
|                                                                                                                | % of Total                                         | 29.2%                          | 14.0%                                                                         | 41.9%                                        | 6.7%   | 91.7%  |
|                                                                                                                | Count                                              | 125                            | 59                                                                            | 175                                          | 28     | 387    |
|                                                                                                                | % within Types of necessary knowledge              | 32.3%                          | 15.2%                                                                         | 45.2%                                        | 7.2%   | 100.0% |
|                                                                                                                | % within Your current status (one answer possible) | 100.0%                         | 100.0%                                                                        | 100.0%                                       | 100.0% | 100.0% |
|                                                                                                                | % of Total                                         | 32.3%                          | 15.2%                                                                         | 45.2%                                        | 7.2%   | 100.0% |

**Table S5.** Types of Necessary Knowledge by Work Experience

| Types of knowledge necessary for tasks and responsibilities the accountant should fulfil during every day work |                                       | work experience |            |             |           | Total  |
|----------------------------------------------------------------------------------------------------------------|---------------------------------------|-----------------|------------|-------------|-----------|--------|
|                                                                                                                |                                       | 0-5 years       | 6-15 years | 16-25 years | 26+ years |        |
| External reporting_no                                                                                          | Count                                 | 16              | 8          | 5           | 3         | 32     |
|                                                                                                                | % within Types of necessary knowledge | 50.0%           | 25.0%      | 15.6%       | 9.4%      | 100.0% |
|                                                                                                                | % within work experience              | 19.8%           | 7.2%       | 4.7%        | 3.4%      | 8.3%   |
|                                                                                                                | % of Total                            | 4.1%            | 2.1%       | 1.3%        | .8%       | 8.3%   |
|                                                                                                                | Count                                 | 65              | 103        | 101         | 86        | 355    |

| Types of knowledge necessary for tasks and responsibilities the accountant should fulfil during every day work |                                       | work experience |            |             |           | Total  |
|----------------------------------------------------------------------------------------------------------------|---------------------------------------|-----------------|------------|-------------|-----------|--------|
|                                                                                                                |                                       | 0-5 years       | 6-15 years | 16-25 years | 26+ years |        |
| External reporting_yes                                                                                         | % within Types of necessary knowledge | 18.3%           | 29.0%      | 28.5%       | 24.2%     | 100.0% |
|                                                                                                                | % within work experience              | 80.2%           | 92.8%      | 95.3%       | 96.6%     | 91.7%  |
|                                                                                                                | % of Total                            | 16.8%           | 26.6%      | 26.1%       | 22.2%     | 91.7%  |
| Total                                                                                                          | Count                                 | 81              | 111        | 106         | 89        | 387    |
|                                                                                                                | % within Types of necessary knowledge | 20.9%           | 28.7%      | 27.4%       | 23.0%     | 100.0% |
|                                                                                                                | % within work experience              | 100.0%          | 100.0%     | 100.0%      | 100.0%    | 100.0% |
|                                                                                                                | % of Total                            | 20.9%           | 28.7%      | 27.4%       | 23.0%     | 100.0% |
| Managerial accounting_no                                                                                       | Count                                 | 45              | 58         | 40          | 31        | 174    |
|                                                                                                                | % within Types of necessary knowledge | 25.9%           | 33.3%      | 23.0%       | 17.8%     | 100.0% |
|                                                                                                                | % within work experience              | 55.6%           | 52.3%      | 37.7%       | 34.8%     | 45.0%  |
|                                                                                                                | % of Total                            | 11.6%           | 15.0%      | 10.3%       | 8.0%      | 45.0%  |
| Managerial accounting_yes                                                                                      | Count                                 | 36              | 53         | 66          | 58        | 213    |
|                                                                                                                | % within Types of necessary knowledge | 16.9%           | 24.9%      | 31.0%       | 27.2%     | 100.0% |
|                                                                                                                | % within work experience              | 44.4%           | 47.7%      | 62.3%       | 65.2%     | 55.0%  |
|                                                                                                                | % of Total                            | 9.3%            | 13.7%      | 17.1%       | 15.0%     | 55.0%  |
| Total                                                                                                          | Count                                 | 81              | 111        | 106         | 89        | 387    |
|                                                                                                                | % within Types of necessary knowledge | 20.9%           | 28.7%      | 27.4%       | 23.0%     | 100.0% |
|                                                                                                                | % within work experience              | 100.0%          | 100.0%     | 100.0%      | 100.0%    | 100.0% |
|                                                                                                                | % of Total                            | 20.9%           | 28.7%      | 27.4%       | 23.0%     | 100.0% |
| Financial analysis_no                                                                                          | Count                                 | 35              | 36         | 32          | 20        | 123    |
|                                                                                                                | % within Types of necessary knowledge | 28.5%           | 29.3%      | 26.0%       | 16.3%     | 100.0% |
|                                                                                                                | % within work experience              | 43.2%           | 32.4%      | 30.2%       | 22.5%     | 31.8%  |
|                                                                                                                | % of Total                            | 9.0%            | 9.3%       | 8.3%        | 5.2%      | 31.8%  |
| Financial analysis_yes                                                                                         | Count                                 | 46              | 75         | 74          | 69        | 264    |
|                                                                                                                | % within Types of necessary knowledge | 17.4%           | 28.4%      | 28.0%       | 26.1%     | 100.0% |
|                                                                                                                | % within work experience              | 56.8%           | 67.6%      | 69.8%       | 77.5%     | 68.2%  |
|                                                                                                                | % of Total                            | 11.9%           | 19.4%      | 19.1%       | 17.8%     | 68.2%  |
| Total                                                                                                          | Count                                 | 81              | 111        | 106         | 89        | 387    |
|                                                                                                                | % within Types of necessary knowledge | 20.9%           | 28.7%      | 27.4%       | 23.0%     | 100.0% |
|                                                                                                                | % within work experience              | 100.0%          | 100.0%     | 100.0%      | 100.0%    | 100.0% |
|                                                                                                                | % of Total                            | 20.9%           | 28.7%      | 27.4%       | 23.0%     | 100.0% |
|                                                                                                                | Count                                 | 43              | 59         | 41          | 32        | 175    |

| Types of knowledge necessary for tasks and responsibilities the accountant should fulfil during every day work |                                       | work experience |            |             |           | Total  |
|----------------------------------------------------------------------------------------------------------------|---------------------------------------|-----------------|------------|-------------|-----------|--------|
|                                                                                                                |                                       | 0-5 years       | 6-15 years | 16-25 years | 26+ years |        |
| Activities related to the management decision-making process_no                                                | % within Types of necessary knowledge | 24.6%           | 33.7%      | 23.4%       | 18.3%     | 100.0% |
|                                                                                                                | % within work experience              | 53.1%           | 53.2%      | 38.7%       | 36.0%     | 45.2%  |
|                                                                                                                | % of Total                            | 11.1%           | 15.2%      | 10.6%       | 8.3%      | 45.2%  |
| Activities related to the management decision-making process_yes                                               | Count                                 | 38              | 52         | 65          | 57        | 212    |
|                                                                                                                | % within Types of necessary knowledge | 17.9%           | 24.5%      | 30.7%       | 26.9%     | 100.0% |
|                                                                                                                | % within work experience              | 46.9%           | 46.8%      | 61.3%       | 64.0%     | 54.8%  |
|                                                                                                                | % of Total                            | 9.8%            | 13.4%      | 16.8%       | 14.7%     | 54.8%  |
| Total                                                                                                          | Count                                 | 81              | 111        | 106         | 89        | 387    |
|                                                                                                                | % within Types of necessary knowledge | 20.9%           | 28.7%      | 27.4%       | 23.0%     | 100.0% |
|                                                                                                                | % within work experience              | 100.0%          | 100.0%     | 100.0%      | 100.0%    | 100.0% |
|                                                                                                                | % of Total                            | 20.9%           | 28.7%      | 27.4%       | 23.0%     | 100.0% |
| Knowledge of laws and legislation_no                                                                           | Count                                 | 26              | 36         | 15          | 12        | 89     |
|                                                                                                                | % within Types of necessary knowledge | 29.2%           | 40.4%      | 16.9%       | 13.5%     | 100.0% |
|                                                                                                                | % within work experience              | 32.1%           | 32.4%      | 14.2%       | 13.5%     | 23.0%  |
|                                                                                                                | % of Total                            | 6.7%            | 9.3%       | 3.9%        | 3.1%      | 23.0%  |
| Knowledge of laws and legislation_yes                                                                          | Count                                 | 55              | 75         | 91          | 77        | 298    |
|                                                                                                                | % within Types of necessary knowledge | 18.5%           | 25.2%      | 30.5%       | 25.8%     | 100.0% |
|                                                                                                                | % within work experience              | 67.9%           | 67.6%      | 85.8%       | 86.5%     | 77.0%  |
|                                                                                                                | % of Total                            | 14.2%           | 19.4%      | 23.5%       | 19.9%     | 77.0%  |
| Total                                                                                                          | Count                                 | 81              | 111        | 106         | 89        | 387    |
|                                                                                                                | % within Types of necessary knowledge | 20.9%           | 28.7%      | 27.4%       | 23.0%     | 100.0% |
|                                                                                                                | % within work experience              | 100.0%          | 100.0%     | 100.0%      | 100.0%    | 100.0% |
|                                                                                                                | % of Total                            | 20.9%           | 28.7%      | 27.4%       | 23.0%     | 100.0% |
| Knowledge of languages_no                                                                                      | Count                                 | 29              | 62         | 55          | 46        | 192    |
|                                                                                                                | % within Types of necessary knowledge | 15.1%           | 32.3%      | 28.6%       | 24.0%     | 100.0% |
|                                                                                                                | % within work experience              | 35.8%           | 55.9%      | 52.4%       | 51.7%     | 49.7%  |
|                                                                                                                | % of Total                            | 7.5%            | 16.1%      | 14.2%       | 11.9%     | 49.7%  |
| Knowledge of languages_yes                                                                                     | Count                                 | 52              | 49         | 50          | 43        | 194    |
|                                                                                                                | % within Types of necessary knowledge | 26.8%           | 25.3%      | 25.8%       | 22.2%     | 100.0% |
|                                                                                                                | % within work experience              | 64.2%           | 44.1%      | 47.6%       | 48.3%     | 50.3%  |

| Types of knowledge necessary for tasks and responsibilities the accountant should fulfil during every day work |                                       | work experience |            |             |           | Total  |
|----------------------------------------------------------------------------------------------------------------|---------------------------------------|-----------------|------------|-------------|-----------|--------|
|                                                                                                                |                                       | 0-5 years       | 6-15 years | 16-25 years | 26+ years |        |
|                                                                                                                | % of Total                            | 13.5%           | 12.7%      | 13.0%       | 11.1%     | 50.3%  |
| Total                                                                                                          | Count                                 | 81              | 111        | 105         | 89        | 386    |
|                                                                                                                | % within Types of necessary knowledge | 21.0%           | 28.8%      | 27.2%       | 23.1%     | 100.0% |
|                                                                                                                | % within work experience              | 100.0%          | 100.0%     | 100.0%      | 100.0%    | 100.0% |
|                                                                                                                | % of Total                            | 21.0%           | 28.8%      | 27.2%       | 23.1%     | 100.0% |
| Knowledge of personnel and staff related_no                                                                    | Count                                 | 59              | 68         | 52          | 37        | 216    |
|                                                                                                                | % within Types of necessary knowledge | 27.3%           | 31.5%      | 24.1%       | 17.1%     | 100.0% |
|                                                                                                                | % within work experience              | 72.8%           | 61.3%      | 49.1%       | 41.6%     | 55.8%  |
|                                                                                                                | % of Total                            | 15.2%           | 17.6%      | 13.4%       | 9.6%      | 55.8%  |
| Knowledge of personnel and staff related_yes                                                                   | Count                                 | 22              | 43         | 54          | 52        | 171    |
|                                                                                                                | % within Types of necessary knowledge | 12.9%           | 25.1%      | 31.6%       | 30.4%     | 100.0% |
|                                                                                                                | % within work experience              | 27.2%           | 38.7%      | 50.9%       | 58.4%     | 44.2%  |
|                                                                                                                | % of Total                            | 5.7%            | 11.1%      | 14.0%       | 13.4%     | 44.2%  |
| Total                                                                                                          | Count                                 | 81              | 111        | 106         | 89        | 387    |
|                                                                                                                | % within Types of necessary knowledge | 20.9%           | 28.7%      | 27.4%       | 23.0%     | 100.0% |
|                                                                                                                | % within work experience              | 100.0%          | 100.0%     | 100.0%      | 100.0%    | 100.0% |
|                                                                                                                | % of Total                            | 20.9%           | 28.7%      | 27.4%       | 23.0%     | 100.0% |

**Table S6. Personal Competencies by Country**

| Country   |                    | Accuracy | Analytical skills and logical | Integrity | Ability to resist work routine | Ability to learn | Responsibility | Determination | Ability to resist stress and pressure | Independence | Decision making | Creativity | Management ability | Risk taking |
|-----------|--------------------|----------|-------------------------------|-----------|--------------------------------|------------------|----------------|---------------|---------------------------------------|--------------|-----------------|------------|--------------------|-------------|
| Lithuania | Mean               | 4.82     | 4.67                          | 4.73      | 3.97                           | 4.43             | 4.82           | 3.92          | 4.26                                  | 3.99         | 4.10            | 3.42       | 3.35               | 3.90        |
|           | N                  | 182      | 182                           | 182       | 182                            | 182              | 182            | 182           | 182                                   | 182          | 182             | 182        | 182                | 182         |
|           | Std. Deviation     | 0.488    | 0.577                         | 0.545     | 0.954                          | 0.767            | 0.423          | 0.966         | 0.805                                 | 1.003        | 0.895           | 1.041      | 0.961              | 1.031       |
|           | Std. Error of Mean | 0.036    | 0.043                         | 0.040     | 0.071                          | 0.057            | 0.031          | 0.072         | 0.060                                 | 0.074        | 0.066           | 0.077      | 0.071              | 0.076       |
|           | Variance           | 0.238    | 0.333                         | 0.297     | 0.911                          | 0.589            | 0.179          | 0.933         | 0.648                                 | 1.005        | 0.801           | 1.084      | 0.924              | 1.062       |
| Latvia    | Mean               | 4.90     | 4.73                          | 4.79      | 3.73                           | 4.74             | 4.86           | 4.56          | 4.52                                  | 4.21         | 4.35            | 3.97       | 3.91               | 3.84        |
|           | N                  | 205      | 205                           | 205       | 205                            | 205              | 205            | 205           | 205                                   | 205          | 205             | 205        | 205                | 205         |
|           | Std. Deviation     | 0.349    | 0.525                         | 0.495     | 1.126                          | 0.504            | 0.397          | 0.604         | 0.676                                 | 0.929        | 0.762           | 0.920      | 0.919              | 1.115       |
|           | Std. Error of Mean | 0.024    | 0.037                         | 0.035     | 0.079                          | 0.035            | 0.028          | 0.042         | 0.047                                 | 0.065        | 0.053           | 0.064      | 0.064              | 0.078       |

|       |                    |       |       |       |       |       |       |       |       |       |       |       |       |       |
|-------|--------------------|-------|-------|-------|-------|-------|-------|-------|-------|-------|-------|-------|-------|-------|
|       | Variance           | 0.122 | 0.276 | 0.245 | 1.268 | 0.254 | 0.158 | 0.365 | 0.457 | 0.863 | 0.580 | 0.847 | 0.845 | 1.244 |
| Total | Mean               | 4.86  | 4.70  | 4.76  | 3.84  | 4.59  | 4.84  | 4.26  | 4.40  | 4.11  | 4.23  | 3.71  | 3.65  | 3.87  |
|       | N                  | 387   | 387   | 387   | 387   | 387   | 387   | 387   | 387   | 387   | 387   | 387   | 387   | 387   |
|       | Std. Deviation     | 0.421 | 0.550 | 0.519 | 1.055 | 0.659 | 0.409 | 0.856 | 0.749 | 0.969 | 0.835 | 1.015 | 0.980 | 1.075 |
|       | Std. Error of Mean | 0.021 | 0.028 | 0.026 | 0.054 | 0.033 | 0.021 | 0.043 | 0.038 | 0.049 | 0.042 | 0.052 | 0.050 | 0.055 |
|       | Variance           | 0.177 | 0.303 | 0.270 | 1.112 | 0.434 | 0.168 | 0.732 | 0.561 | 0.940 | 0.697 | 1.031 | 0.960 | 1.156 |

Table S7. Personal Competencies by Category of the Company

| Category of company |                    | Accuracy | Analytical skills and logical thinking | Integrity | Ability to resist work routine | Ability to learn | Responsibility | Determination | Ability to resist stress and pressure | Independence | Decision making | Creativity | Mmanagement ability | Rrisk taking |
|---------------------|--------------------|----------|----------------------------------------|-----------|--------------------------------|------------------|----------------|---------------|---------------------------------------|--------------|-----------------|------------|---------------------|--------------|
| Micro               | Mean               | 4.90     | 4.71                                   | 4.84      | 3.99                           | 4.70             | 4.84           | 4.39          | 4.51                                  | 4.19         | 4.31            | 3.94       | 3.76                | 3.97         |
|                     | N                  | 129      | 129                                    | 129       | 129                            | 129              | 129            | 129           | 129                                   | 129          | 129             | 129        | 129                 | 129          |
|                     | Std. Deviation     | 0.302    | 0.548                                  | 0.447     | 0.972                          | 0.553            | 0.429          | 0.794         | 0.686                                 | 0.893        | 0.808           | 0.916      | 0.958               | 1.030        |
|                     | Std. Error of Mean | 0.027    | 0.048                                  | 0.039     | 0.086                          | 0.049            | 0.038          | 0.070         | 0.060                                 | 0.079        | 0.071           | 0.081      | 0.084               | 0.091        |
|                     | Variance           | 0.091    | 0.300                                  | 0.200     | 0.945                          | 0.306            | 0.184          | 0.630         | 0.471                                 | 0.798        | 0.653           | 0.840      | 0.918               | 1.062        |
| Small               | Mean               | 4.80     | 4.67                                   | 4.70      | 3.73                           | 4.58             | 4.83           | 4.29          | 4.39                                  | 4.25         | 4.25            | 3.77       | 3.68                | 3.78         |
|                     | N                  | 120      | 120                                    | 120       | 120                            | 120              | 120            | 120           | 120                                   | 120          | 120             | 120        | 120                 | 120          |
|                     | Std. Deviation     | 0.559    | 0.585                                  | 0.588     | 1.145                          | 0.656            | 0.461          | 0.803         | 0.748                                 | 0.928        | 0.791           | 1.019      | 0.996               | 1.086        |
|                     | Std. Error of Mean | 0.051    | 0.053                                  | 0.054     | 0.104                          | 0.060            | 0.042          | 0.073         | 0.068                                 | 0.085        | 0.072           | 0.093      | 0.091               | 0.099        |
|                     | Variance           | 0.313    | 0.342                                  | 0.346     | 1.310                          | 0.430            | 0.213          | 0.645         | 0.560                                 | 0.861        | 0.626           | 1.038      | 0.991               | 1.180        |
| Medium              | Mean               | 4.86     | 4.71                                   | 4.75      | 3.86                           | 4.51             | 4.90           | 4.16          | 4.19                                  | 3.91         | 4.24            | 3.51       | 3.58                | 3.95         |
|                     | N                  | 79       | 79                                     | 79        | 79                             | 79               | 79             | 79            | 79                                    | 79           | 79              | 79         | 79                  | 79           |
|                     | Std. Deviation     | 0.416    | 0.510                                  | 0.493     | 1.009                          | 0.732            | 0.304          | 0.808         | 0.833                                 | 1.002        | 0.880           | 0.972      | 0.942               | 1.024        |
|                     | Std. Error of Mean | 0.047    | 0.057                                  | 0.055     | 0.114                          | 0.082            | 0.034          | 0.091         | 0.094                                 | 0.113        | 0.099           | 0.109      | 0.106               | 0.115        |
|                     | Variance           | 0.173    | 0.260                                  | 0.243     | 1.019                          | 0.535            | 0.092          | 0.652         | 0.694                                 | 1.005        | 0.775           | 0.945      | 0.887               | 1.049        |
| Large               | Mean               | 4.90     | 4.75                                   | 4.75      | 3.73                           | 4.49             | 4.83           | 4.05          | 4.44                                  | 3.88         | 4.02            | 3.36       | 3.41                | 3.71         |
|                     | N                  | 59       | 59                                     | 59        | 59                             | 59               | 59             | 59            | 59                                    | 59           | 59              | 59         | 59                  | 59           |
|                     | Std. Deviation     | 0.305    | 0.544                                  | 0.544     | 1.080                          | 0.751            | 0.378          | 1.090         | 0.726                                 | 1.100        | 0.900           | 1.141      | 1.019               | 1.204        |

| Category of company |                    | Accuracy | Analytical skills and logical thinking | Integrity | Ability to resist work routine | Ability to learn | Responsibility | Determination | Ability to resist stress and pressure | Independence | Decision making | Creativity | Management ability | Risk taking |
|---------------------|--------------------|----------|----------------------------------------|-----------|--------------------------------|------------------|----------------|---------------|---------------------------------------|--------------|-----------------|------------|--------------------|-------------|
|                     | Std. Error of Mean | 0.040    | 0.071                                  | 0.071     | 0.141                          | 0.098            | 0.049          | 0.142         | 0.094                                 | 0.143        | 0.117           | 0.149      | 0.133              | 0.157       |
|                     | Variance           | 0.093    | 0.296                                  | 0.296     | 1.167                          | 0.565            | 0.143          | 1.187         | 0.527                                 | 1.210        | 0.810           | 1.302      | 1.039              | 1.450       |
| Total               | Mean               | 4.86     | 4.70                                   | 4.76      | 3.84                           | 4.59             | 4.84           | 4.26          | 4.40                                  | 4.11         | 4.23            | 3.71       | 3.65               | 3.87        |
|                     | N                  | 387      | 387                                    | 387       | 387                            | 387              | 387            | 387           | 387                                   | 387          | 387             | 387        | 387                | 387         |
|                     | Std. Deviation     | 0.421    | 0.550                                  | 0.519     | 1.055                          | 0.659            | 0.409          | 0.856         | 0.749                                 | 0.969        | 0.835           | 1.015      | 0.980              | 1.075       |
|                     | Std. Error of Mean | 0.021    | 0.028                                  | 0.026     | 0.054                          | 0.033            | 0.021          | 0.043         | 0.038                                 | 0.049        | 0.042           | 0.052      | 0.050              | 0.055       |
|                     | Variance           | 0.177    | 0.303                                  | 0.270     | 1.112                          | 0.434            | 0.168          | 0.732         | 0.561                                 | 0.940        | 0.697           | 1.031      | 0.960              | 1.156       |

Table S8. Personal Competencies by Current Working Position

| Current working position                                                                              |                | Accuracy | Analytical skills and logical thinking | Integrity | Ability to resist work routine | Ability to learn | Responsibility | Determination | Ability to resist stress and pressure | Independence | Decision making | Creativity | Management ability | Risk taking |
|-------------------------------------------------------------------------------------------------------|----------------|----------|----------------------------------------|-----------|--------------------------------|------------------|----------------|---------------|---------------------------------------|--------------|-----------------|------------|--------------------|-------------|
| Accountant in business company                                                                        | N              | 125      | 125                                    | 125       | 125                            | 125              | 125            | 125           | 125                                   | 125          | 125             | 125        | 125                | 125         |
|                                                                                                       | Mean           | 4.88     | 4.73                                   | 4.75      | 3.89                           | 4.65             | 4.87           | 4.26          | 4.39                                  | 4.09         | 4.28            | 3.78       | 3.80               | 3.85        |
|                                                                                                       | Std. Deviation | 0.413    | 0.544                                  | 0.534     | 1.064                          | 0.599            | 0.421          | 0.851         | 0.739                                 | 0.984        | 0.819           | 1.005      | 0.976              | 1.136       |
|                                                                                                       | Variance       | 0.171    | 0.296                                  | 0.285     | 1.133                          | 0.359            | 0.177          | 0.724         | 0.547                                 | 0.968        | 0.671           | 1.009      | 0.952              | 1.291       |
| Accountant in state administration, state organisation or municipality, or association and foundation | N              | 59       | 59                                     | 59        | 59                             | 59               | 59             | 59            | 59                                    | 59           | 59              | 59         | 59                 | 59          |
|                                                                                                       | Mean           | 4.88     | 4.75                                   | 4.92      | 3.97                           | 4.51             | 4.90           | 4.36          | 4.42                                  | 4.19         | 4.22            | 3.53       | 3.66               | 4.02        |
|                                                                                                       | Std. Deviation | 0.375    | 0.477                                  | 0.337     | 0.982                          | 0.679            | 0.305          | 0.804         | 0.700                                 | 0.900        | 0.811           | 0.989      | 1.010              | 1.091       |
|                                                                                                       | Variance       | 0.141    | 0.227                                  | 0.113     | 0.964                          | 0.461            | 0.093          | 0.647         | 0.490                                 | 0.809        | 0.658           | 0.978      | 1.021              | 1.189       |
| Accountant in outsourcing accounting company                                                          | N              | 175      | 175                                    | 175       | 175                            | 175              | 175            | 175           | 175                                   | 175          | 175             | 175        | 175                | 175         |
|                                                                                                       | Mean           | 4.83     | 4.73                                   | 4.71      | 3.77                           | 4.59             | 4.81           | 4.26          | 4.42                                  | 4.09         | 4.24            | 3.74       | 3.56               | 3.86        |
|                                                                                                       | Std. Deviation | 0.460    | 0.508                                  | 0.568     | 1.102                          | 0.680            | 0.434          | 0.864         | 0.768                                 | 1.007        | 0.816           | 1.022      | 0.938              | 1.015       |
|                                                                                                       | Variance       | 0.212    | 0.258                                  | 0.323     | 1.215                          | 0.462            | 0.188          | 0.747         | 0.590                                 | 1.015        | 0.666           | 1.045      | 0.880              | 1.031       |
| Other                                                                                                 | N              | 28       | 28                                     | 28        | 28                             | 28               | 28             | 28            | 28                                    | 28           | 28              | 28         | 28                 | 28          |
|                                                                                                       | Mean           | 4.93     | 4.36                                   | 4.82      | 3.86                           | 4.54             | 4.82           | 4.07          | 4.21                                  | 4.11         | 4.00            | 3.57       | 3.46               | 3.71        |

| Current working position |                | Accuracy | Analytical skills and logical thinking | Integrity | Ability to resist work routine | Ability to learn | Responsibility | Determination | Ability to resist stress and pressure | Independence | Decision making | Creativity | Management ability | Risk taking |
|--------------------------|----------------|----------|----------------------------------------|-----------|--------------------------------|------------------|----------------|---------------|---------------------------------------|--------------|-----------------|------------|--------------------|-------------|
|                          | Std. Deviation | 0.262    | 0.826                                  | 0.390     | 0.848                          | 0.744            | 0.390          | 0.940         | 0.787                                 | 0.832        | 1.054           | 1.069      | 1.138              | 1.150       |
|                          | Variance       | 0.069    | 0.683                                  | 0.152     | 0.720                          | 0.554            | 0.152          | 0.884         | 0.619                                 | 0.692        | 1.111           | 1.143      | 1.295              | 1.323       |
| Total                    | N              | 387      | 387                                    | 387       | 387                            | 387              | 387            | 387           | 387                                   | 387          | 387             | 387        | 387                | 387         |
|                          | Mean           | 4.86     | 4.70                                   | 4.76      | 3.84                           | 4.59             | 4.84           | 4.26          | 4.40                                  | 4.11         | 4.23            | 3.71       | 3.65               | 3.87        |
|                          | Std. Deviation | 0.421    | 0.550                                  | 0.519     | 1.055                          | 0.659            | 0.409          | 0.856         | 0.749                                 | 0.969        | 0.835           | 1.015      | 0.980              | 1.075       |
|                          | Variance       | 0.177    | 0.303                                  | 0.270     | 1.112                          | 0.434            | 0.168          | 0.732         | 0.561                                 | 0.940        | 0.697           | 1.031      | 0.960              | 1.156       |

**Table S9. Personal Competences by Work Experience**

| Work experience |                | Accuracy | Analytical skills and logical | Integrity | Ability to resist work routine | Ability to learn | Responsibility | Determination | Ability to resist stress and pressure | Independence | Decision making | Creativity | Management ability | Risk taking |
|-----------------|----------------|----------|-------------------------------|-----------|--------------------------------|------------------|----------------|---------------|---------------------------------------|--------------|-----------------|------------|--------------------|-------------|
| 0-5 years       | N              | 81       | 81                            | 81        | 81                             | 81               | 81             | 81            | 81                                    | 81           | 81              | 81         | 81                 | 81          |
|                 | Mean           | 4.89     | 4.57                          | 4.67      | 3.49                           | 4.49             | 4.83           | 4.10          | 4.35                                  | 3.83         | 4.14            | 3.33       | 3.25               | 3.80        |
|                 | Std. Deviation | 0.354    | 0.631                         | 0.612     | 1.085                          | 0.654            | 0.412          | 0.917         | 0.744                                 | 1.082        | 0.802           | 1.072      | 0.969              | 1.054       |
|                 | Variance       | 0.125    | 0.398                         | 0.375     | 1.178                          | 0.428            | 0.170          | 0.840         | 0.554                                 | 1.170        | 0.644           | 1.150      | 0.938              | 1.110       |
| 6-15 years      | N              | 111      | 111                           | 111       | 111                            | 111              | 111            | 111           | 111                                   | 111          | 111             | 111        | 111                | 111         |
|                 | Mean           | 4.84     | 4.67                          | 4.73      | 3.83                           | 4.49             | 4.81           | 4.23          | 4.41                                  | 4.11         | 4.22            | 3.59       | 3.58               | 3.87        |
|                 | Std. Deviation | 0.458    | 0.608                         | 0.538     | 1.143                          | 0.830            | 0.437          | 0.924         | 0.813                                 | 0.908        | 0.899           | 1.031      | 0.968              | 1.054       |
|                 | Variance       | 0.210    | 0.370                         | 0.290     | 1.307                          | 0.688            | 0.191          | 0.854         | 0.661                                 | 0.825        | 0.807           | 1.063      | 0.937              | 1.111       |
| 16-25 years     | N              | 106      | 106                           | 106       | 106                            | 106              | 106            | 106           | 106                                   | 106          | 106             | 106        | 106                | 106         |
|                 | Mean           | 4.85     | 4.79                          | 4.75      | 3.91                           | 4.69             | 4.84           | 4.33          | 4.40                                  | 4.11         | 4.25            | 3.86       | 3.75               | 3.77        |
|                 | Std. Deviation | 0.432    | 0.452                         | 0.531     | 1.019                          | 0.558            | 0.439          | 0.789         | 0.764                                 | 0.939        | 0.817           | 0.951      | 0.937              | 1.140       |
|                 | Variance       | 0.187    | 0.204                         | 0.282     | 1.039                          | 0.312            | 0.193          | 0.623         | 0.584                                 | 0.882        | 0.668           | 0.904      | 0.877              | 1.301       |
| 26+ years       | N              | 89       | 89                            | 89        | 89                             | 89               | 89             | 89            | 89                                    | 89           | 89              | 89         | 89                 | 89          |
|                 | Mean           | 4.88     | 4.76                          | 4.90      | 4.10                           | 4.70             | 4.91           | 4.36          | 4.44                                  | 4.35         | 4.31            | 4.02       | 3.98               | 4.03        |
|                 | Std. Deviation | 0.422    | 0.477                         | 0.339     | 0.867                          | 0.486            | 0.325          | 0.772         | 0.656                                 | 0.918        | 0.806           | 0.892      | 0.929              | 1.038       |
|                 | Variance       | 0.178    | 0.228                         | 0.115     | 0.751                          | 0.236            | 0.105          | 0.597         | 0.431                                 | 0.843        | 0.650           | 0.795      | 0.863              | 1.078       |
| Total           | N              | 387      | 387                           | 387       | 387                            | 387              | 387            | 387           | 387                                   | 387          | 387             | 387        | 387                | 387         |
|                 | Mean           | 4.86     | 4.70                          | 4.76      | 3.84                           | 4.59             | 4.84           | 4.26          | 4.40                                  | 4.11         | 4.23            | 3.71       | 3.65               | 3.87        |



| Work experience |                | Accuracy | Analytical skills and logical | Integrity | Ability to resist work routine | Ability to learn | Responsibility | Determination | Ability to resist stress and pressure | Independence | Decision making | Creativity | Management ability | Risk taking |
|-----------------|----------------|----------|-------------------------------|-----------|--------------------------------|------------------|----------------|---------------|---------------------------------------|--------------|-----------------|------------|--------------------|-------------|
|                 | Std. Deviation | 0.421    | 0.550                         | 0.519     | 1.055                          | 0.659            | 0.409          | 0.856         | 0.749                                 | 0.969        | 0.835           | 1.015      | 0.980              | 1.075       |
|                 | Variance       | 0.177    | 0.303                         | 0.270     | 1.112                          | 0.434            | 0.168          | 0.732         | 0.561                                 | 0.940        | 0.697           | 1.031      | 0.960              | 1.156       |

**Table S10.** Professional Competences by Country

| Country   |                    | Ability to record economic transaction to accounting documents and registers | Ability to prepare financial statements | Ability to form financial accounting policy | Ability to form tax accounting policy | Ability to form management accounting policy | Ability to form information system of the company (including accounting system) | Ability to plan, analyse and evaluate company's performance (including accounting system) | Ability to present analysis results, to identify problems and to suggest solutions to problem (including accounting system) | Ability to support internal control system (including accounting system) | Be interested in innovations and changes in regulation |
|-----------|--------------------|------------------------------------------------------------------------------|-----------------------------------------|---------------------------------------------|---------------------------------------|----------------------------------------------|---------------------------------------------------------------------------------|-------------------------------------------------------------------------------------------|-----------------------------------------------------------------------------------------------------------------------------|--------------------------------------------------------------------------|--------------------------------------------------------|
| Lithuania | Mean               | 4.71                                                                         | 4.63                                    | 4.09                                        | 3.97                                  | 3.62                                         | 3.78                                                                            | 4.04                                                                                      | 4.17                                                                                                                        | 3.64                                                                     | 4.31                                                   |
|           | N                  | 182                                                                          | 182                                     | 182                                         | 182                                   | 182                                          | 182                                                                             | 182                                                                                       | 182                                                                                                                         | 182                                                                      | 182                                                    |
|           | Std. Deviation     | 0.593                                                                        | 0.737                                   | 1.012                                       | 1.032                                 | 1.069                                        | 0.984                                                                           | 1.043                                                                                     | 0.909                                                                                                                       | 1.093                                                                    | 0.817                                                  |
|           | Std. Error of Mean | 0.044                                                                        | 0.055                                   | 0.075                                       | 0.077                                 | 0.079                                        | 0.073                                                                           | 0.077                                                                                     | 0.067                                                                                                                       | 0.081                                                                    | 0.061                                                  |
|           | Variance           | 0.351                                                                        | 0.543                                   | 1.024                                       | 1.066                                 | 1.143                                        | 0.968                                                                           | 1.087                                                                                     | 0.827                                                                                                                       | 1.194                                                                    | 0.667                                                  |
| Latvia    | Mean               | 4.81                                                                         | 4.85                                    | 4.51                                        | 4.42                                  | 4.20                                         | 3.42                                                                            | 4.49                                                                                      | 4.14                                                                                                                        | 4.17                                                                     | 4.32                                                   |
|           | N                  | 205                                                                          | 205                                     | 205                                         | 205                                   | 205                                          | 205                                                                             | 205                                                                                       | 205                                                                                                                         | 205                                                                      | 205                                                    |
|           | Std. Deviation     | 0.490                                                                        | 0.441                                   | 0.826                                       | 0.880                                 | 0.981                                        | 1.159                                                                           | 0.752                                                                                     | 0.852                                                                                                                       | 0.826                                                                    | 0.831                                                  |
|           | Std. Error of Mean | 0.034                                                                        | 0.031                                   | 0.058                                       | 0.061                                 | 0.068                                        | 0.081                                                                           | 0.052                                                                                     | 0.060                                                                                                                       | 0.058                                                                    | 0.058                                                  |
|           | Variance           | 0.240                                                                        | 0.194                                   | 0.683                                       | 0.774                                 | 0.962                                        | 1.343                                                                           | 0.565                                                                                     | 0.726                                                                                                                       | 0.681                                                                    | 0.690                                                  |
| Total     | Mean               | 4.76                                                                         | 4.75                                    | 4.31                                        | 4.21                                  | 3.93                                         | 3.59                                                                            | 4.28                                                                                      | 4.15                                                                                                                        | 3.92                                                                     | 4.32                                                   |
|           | N                  | 387                                                                          | 387                                     | 387                                         | 387                                   | 387                                          | 387                                                                             | 387                                                                                       | 387                                                                                                                         | 387                                                                      | 387                                                    |
|           | Std. Deviation     | 0.542                                                                        | 0.608                                   | 0.940                                       | 0.979                                 | 1.061                                        | 1.094                                                                           | 0.927                                                                                     | 0.879                                                                                                                       | 0.995                                                                    | 0.823                                                  |
|           | Std. Error of Mean | 0.028                                                                        | 0.031                                   | 0.048                                       | 0.050                                 | 0.054                                        | 0.056                                                                           | 0.047                                                                                     | 0.045                                                                                                                       | 0.051                                                                    | 0.042                                                  |
|           | Variance           | 0.294                                                                        | 0.370                                   | 0.884                                       | 0.959                                 | 1.126                                        | 1.196                                                                           | 0.859                                                                                     | 0.772                                                                                                                       | 0.991                                                                    | 0.678                                                  |

**Table S11.** Professional Competences by Category of the Company

[illegible]

| Category of the company |                    | Ability to record economic transaction to accounting documents and registers | Ability to prepare financial statements | Ability to form financial accounting policy | Ability to form tax accounting policy | Ability to form management accounting policy | Ability to form information system of the company (including accounting system) | Ability to plan, analyse and evaluate company's performance (including accounting system) | Ability to present analysis results, to identify problems and to suggest solutions to problem (including accounting system) | Ability to support internal control system (including accounting system) | Be interested in innovations and changes in regulation |
|-------------------------|--------------------|------------------------------------------------------------------------------|-----------------------------------------|---------------------------------------------|---------------------------------------|----------------------------------------------|---------------------------------------------------------------------------------|-------------------------------------------------------------------------------------------|-----------------------------------------------------------------------------------------------------------------------------|--------------------------------------------------------------------------|--------------------------------------------------------|
|                         | Std. Deviation     | 0.512                                                                        | 0.375                                   | 0.770                                       | 0.806                                 | 1.026                                        | 1.062                                                                           | 0.783                                                                                     | 0.849                                                                                                                       | 0.927                                                                    | 0.818                                                  |
|                         | Std. Error of Mean | 0.045                                                                        | 0.033                                   | 0.068                                       | 0.071                                 | 0.090                                        | 0.093                                                                           | 0.069                                                                                     | 0.075                                                                                                                       | 0.082                                                                    | 0.072                                                  |
|                         | Variance           | 0.262                                                                        | 0.141                                   | 0.592                                       | 0.650                                 | 1.053                                        | 1.127                                                                           | 0.612                                                                                     | 0.772                                                                                                                       | 0.819                                                                    | 0.669                                                  |
| Small                   | Mean               | 4.73                                                                         | 4.83                                    | 4.44                                        | 4.31                                  | 4.02                                         | 3.61                                                                            | 4.38                                                                                      | 4.18                                                                                                                        | 3.91                                                                     | 4.36                                                   |
|                         | N                  | 120                                                                          | 120                                     | 120                                         | 120                                   | 120                                          | 120                                                                             | 120                                                                                       | 120                                                                                                                         | 120                                                                      | 120                                                    |
|                         | Std. Deviation     | 0.608                                                                        | 0.423                                   | 0.848                                       | 0.942                                 | 1.021                                        | 1.154                                                                           | 0.881                                                                                     | 0.827                                                                                                                       | 1.004                                                                    | 0.818                                                  |
|                         | Std. Error of Mean | 0.055                                                                        | 0.039                                   | 0.077                                       | 0.086                                 | 0.093                                        | 0.105                                                                           | 0.080                                                                                     | 0.075                                                                                                                       | 0.092                                                                    | 0.075                                                  |
|                         | Variance           | 0.369                                                                        | 0.179                                   | 0.719                                       | 0.887                                 | 1.042                                        | 1.333                                                                           | 0.776                                                                                     | 0.778                                                                                                                       | 0.929                                                                    | 0.669                                                  |
| Medium                  | Mean               | 4.78                                                                         | 4.54                                    | 4.04                                        | 3.87                                  | 3.76                                         | 3.62                                                                            | 4.13                                                                                      | 4.11                                                                                                                        | 3.84                                                                     | 4.34                                                   |
|                         | N                  | 79                                                                           | 79                                      | 79                                          | 79                                    | 79                                           | 79                                                                              | 79                                                                                        | 79                                                                                                                          | 79                                                                       | 79                                                     |
|                         | Std. Deviation     | 0.472                                                                        | 0.829                                   | 1.149                                       | 1.114                                 | 1.089                                        | 1.029                                                                           | 1.055                                                                                     | 0.847                                                                                                                       | 1.055                                                                    | 0.799                                                  |
|                         | Std. Error of Mean | 0.053                                                                        | 0.093                                   | 0.129                                       | 0.125                                 | 0.122                                        | 0.116                                                                           | 0.119                                                                                     | 0.095                                                                                                                       | 0.119                                                                    | 0.090                                                  |
|                         | Variance           | 0.222                                                                        | 0.687                                   | 1.319                                       | 1.240                                 | 1.185                                        | 1.059                                                                           | 1.112                                                                                     | 0.737                                                                                                                       | 1.079                                                                    | 0.638                                                  |
| Large                   | Mean               | 4.71                                                                         | 4.59                                    | 4.14                                        | 4.02                                  | 3.71                                         | 3.68                                                                            | 4.03                                                                                      | 4.24                                                                                                                        | 3.76                                                                     | 4.20                                                   |
|                         | N                  | 59                                                                           | 59                                      | 59                                          | 59                                    | 59                                           | 59                                                                              | 59                                                                                        | 59                                                                                                                          | 59                                                                       | 59                                                     |
|                         | Std. Deviation     | 0.559                                                                        | 0.853                                   | 1.058                                       | 1.075                                 | 1.145                                        | 1.136                                                                           | 1.066                                                                                     | 1.006                                                                                                                       | 1.088                                                                    | 0.886                                                  |
|                         | Std. Error of Mean | 0.073                                                                        | 0.111                                   | 0.138                                       | 0.140                                 | 0.149                                        | 0.148                                                                           | 0.139                                                                                     | 0.131                                                                                                                       | 0.142                                                                    | 0.115                                                  |
|                         | Variance           | 0.312                                                                        | 0.728                                   | 1.119                                       | 1.155                                 | 1.312                                        | 1.291                                                                           | 1.137                                                                                     | 0.839                                                                                                                       | 1.357                                                                    | 0.786                                                  |
| Total                   | Mean               | 4.76                                                                         | 4.75                                    | 4.31                                        | 4.21                                  | 3.93                                         | 3.59                                                                            | 4.28                                                                                      | 4.17                                                                                                                        | 3.90                                                                     | 4.32                                                   |
|                         | N                  | 387                                                                          | 387                                     | 387                                         | 387                                   | 387                                          | 387                                                                             | 387                                                                                       | 387                                                                                                                         | 387                                                                      | 387                                                    |
|                         | Std. Deviation     | 0.542                                                                        | 0.608                                   | 0.940                                       | 0.979                                 | 1.061                                        | 1.094                                                                           | 0.927                                                                                     | 0.865                                                                                                                       | 1.003                                                                    | 0.823                                                  |
|                         | Std. Error of Mean | 0.028                                                                        | 0.031                                   | 0.048                                       | 0.050                                 | 0.054                                        | 0.056                                                                           | 0.047                                                                                     | 0.044                                                                                                                       | 0.051                                                                    | 0.042                                                  |
|                         | Variance           | 0.294                                                                        | 0.370                                   | 0.884                                       | 0.959                                 | 1.126                                        | 1.196                                                                           | 0.859                                                                                     | 0.772                                                                                                                       | 0.991                                                                    | 0.678                                                  |

Table S12. Professional Competences by Current Working Position

| Current working position                                                                              |                | Ability to record economic transaction to accounting documents and registers | Ability to prepare financial statements | Ability to form financial accounting policy | Ability to form tax accounting policy | Ability to form management accounting policy | Ability to form information system of the company | Ability to plan, analyse and evaluate company's performance | Ability to support internal control system | Ability to present analysis results, to identify problems and to | Be interested in innovations and changes in regulations |
|-------------------------------------------------------------------------------------------------------|----------------|------------------------------------------------------------------------------|-----------------------------------------|---------------------------------------------|---------------------------------------|----------------------------------------------|---------------------------------------------------|-------------------------------------------------------------|--------------------------------------------|------------------------------------------------------------------|---------------------------------------------------------|
| Accountant in business company                                                                        | N              | 125                                                                          | 125                                     | 125                                         | 125                                   | 125                                          | 125                                               | 125                                                         | 125                                        | 125                                                              | 125                                                     |
|                                                                                                       | Mean           | 4.71                                                                         | 4.74                                    | 4.41                                        | 4.28                                  | 4.01                                         | 3.65                                              | 4.33                                                        | 3.87                                       | 4.04                                                             | 4.29                                                    |
|                                                                                                       | Std. Deviation | 0.593                                                                        | 0.646                                   | 0.934                                       | 0.964                                 | 1.051                                        | 1.131                                             | 0.990                                                       | 1.047                                      | 0.979                                                            | 0.869                                                   |
|                                                                                                       | Variance       | 0.352                                                                        | 0.418                                   | 0.873                                       | 0.929                                 | 1.105                                        | 1.278                                             | 0.980                                                       | 1.096                                      | 0.958                                                            | 0.755                                                   |
| Accountant in state administration, state or municipality organisation, or association and foundation | N              | 59                                                                           | 59                                      | 59                                          | 59                                    | 59                                           | 59                                                | 59                                                          | 59                                         | 59                                                               | 59                                                      |
|                                                                                                       | Mean           | 4.85                                                                         | 4.75                                    | 4.25                                        | 4.03                                  | 3.92                                         | 3.76                                              | 4.15                                                        | 4.08                                       | 4.36                                                             | 4.44                                                    |
|                                                                                                       | Std. Deviation | 0.363                                                                        | 0.544                                   | 0.902                                       | 0.946                                 | 0.988                                        | 0.953                                             | 0.784                                                       | 0.896                                      | 0.713                                                            | 0.749                                                   |
|                                                                                                       | Variance       | 0.132                                                                        | 0.296                                   | 0.814                                       | 0.895                                 | 0.975                                        | 0.908                                             | 0.614                                                       | 0.803                                      | 0.509                                                            | 0.561                                                   |
| Accountant in outsourcing accounting company                                                          | N              | 175                                                                          | 175                                     | 175                                         | 175                                   | 175                                          | 175                                               | 175                                                         | 175                                        | 175                                                              | 175                                                     |
|                                                                                                       | Mean           | 4.77                                                                         | 4.78                                    | 4.29                                        | 4.23                                  | 3.85                                         | 3.47                                              | 4.32                                                        | 3.88                                       | 4.21                                                             | 4.32                                                    |
|                                                                                                       | Std. Deviation | 0.574                                                                        | 0.559                                   | 0.896                                       | 0.945                                 | 1.056                                        | 1.097                                             | 0.897                                                       | 0.984                                      | 0.792                                                            | 0.788                                                   |
|                                                                                                       | Variance       | 0.330                                                                        | 0.312                                   | 0.803                                       | 0.893                                 | 1.116                                        | 1.204                                             | 0.805                                                       | 0.968                                      | 0.627                                                            | 0.621                                                   |
| Other                                                                                                 | N              | 28                                                                           | 28                                      | 28                                          | 28                                    | 28                                           | 28                                                | 28                                                          | 28                                         | 28                                                               | 28                                                      |
|                                                                                                       | Mean           | 4.82                                                                         | 4.61                                    | 4.18                                        | 4.11                                  | 4.04                                         | 3.71                                              | 4.04                                                        | 3.79                                       | 4.11                                                             | 4.14                                                    |
|                                                                                                       | Std. Deviation | 0.390                                                                        | 0.832                                   | 1.278                                       | 1.286                                 | 1.290                                        | 1.150                                             | 1.071                                                       | 1.134                                      | 0.994                                                            | 0.970                                                   |
|                                                                                                       | Variance       | 0.152                                                                        | 0.692                                   | 1.634                                       | 1.655                                 | 1.665                                        | 1.323                                             | 1.147                                                       | 1.286                                      | 0.988                                                            | 0.942                                                   |
| Total                                                                                                 | N              | 387                                                                          | 387                                     | 387                                         | 387                                   | 387                                          | 387                                               | 387                                                         | 387                                        | 387                                                              | 387                                                     |
|                                                                                                       | Mean           | 4.76                                                                         | 4.75                                    | 4.31                                        | 4.21                                  | 3.93                                         | 3.59                                              | 4.28                                                        | 3.90                                       | 4.17                                                             | 4.32                                                    |
|                                                                                                       | Std. Deviation | 0.542                                                                        | 0.608                                   | 0.940                                       | 0.979                                 | 1.061                                        | 1.094                                             | 0.927                                                       | 1.003                                      | 0.865                                                            | 0.823                                                   |
|                                                                                                       | Variance       | 0.294                                                                        | 0.370                                   | 0.884                                       | 0.959                                 | 1.126                                        | 1.196                                             | 0.859                                                       | 1.006                                      | 0.748                                                            | 0.678                                                   |

Table S13. Professional Competences by Work Experience

| Work experience |                | Ability to record economic transaction to accounting documents and registers | Ability to prepare financial statements | Ability to form financial accounting policy | Ability to form tax accounting policy | Ability to form management accounting policy | Ability to form information system of the company | Ability to plan, analyse and evaluate company's performance | Ability to support internal control system | Ability to present analysis results, to identify problems and to suggest solutions to problems | Be interested in innovations and changes in regulations |
|-----------------|----------------|------------------------------------------------------------------------------|-----------------------------------------|---------------------------------------------|---------------------------------------|----------------------------------------------|---------------------------------------------------|-------------------------------------------------------------|--------------------------------------------|------------------------------------------------------------------------------------------------|---------------------------------------------------------|
| 0-5 years       | N              | 81                                                                           | 81                                      | 81                                          | 81                                    | 81                                           | 81                                                | 81                                                          | 81                                         | 81                                                                                             | 81                                                      |
|                 | Mean           | 4.79                                                                         | 4.75                                    | 4.10                                        | 3.91                                  | 3.64                                         | 3.44                                              | 4.09                                                        | 3.63                                       | 4.05                                                                                           | 4.26                                                    |
|                 | Std. Deviation | 0.493                                                                        | 0.603                                   | 1.068                                       | 1.086                                 | 1.121                                        | 1.151                                             | 1.063                                                       | 1.054                                      | 0.947                                                                                          | 0.738                                                   |
|                 | Variance       | 0.243                                                                        | 0.363                                   | 1.140                                       | 1.180                                 | 1.258                                        | 1.325                                             | 1.130                                                       | 1.111                                      | 0.898                                                                                          | 0.544                                                   |
| 6-15 years      | N              | 111                                                                          | 111                                     | 111                                         | 111                                   | 111                                          | 111                                               | 111                                                         | 111                                        | 111                                                                                            | 111                                                     |
|                 | Mean           | 4.80                                                                         | 4.64                                    | 4.16                                        | 4.10                                  | 3.79                                         | 3.56                                              | 4.18                                                        | 3.82                                       | 4.09                                                                                           | 4.32                                                    |
|                 | Std. Deviation | 0.501                                                                        | 0.748                                   | 1.023                                       | 1.070                                 | 1.121                                        | 1.050                                             | 1.046                                                       | 1.063                                      | 0.910                                                                                          | 0.863                                                   |
|                 | Variance       | 0.251                                                                        | 0.560                                   | 1.046                                       | 1.145                                 | 1.257                                        | 1.103                                             | 1.095                                                       | 1.131                                      | 0.828                                                                                          | 0.745                                                   |
| 16-25 years     | N              | 106                                                                          | 106                                     | 106                                         | 106                                   | 106                                          | 106                                               | 106                                                         | 106                                        | 106                                                                                            | 106                                                     |
|                 | Mean           | 4.72                                                                         | 4.78                                    | 4.36                                        | 4.29                                  | 4.01                                         | 3.64                                              | 4.41                                                        | 3.97                                       | 4.18                                                                                           | 4.23                                                    |
|                 | Std. Deviation | 0.598                                                                        | 0.586                                   | 0.864                                       | 0.873                                 | 1.000                                        | 1.114                                             | 0.814                                                       | 0.980                                      | 0.871                                                                                          | 0.897                                                   |
|                 | Variance       | 0.357                                                                        | 0.343                                   | 0.746                                       | 0.761                                 | 1.000                                        | 1.242                                             | 0.662                                                       | 0.961                                      | 0.758                                                                                          | 0.805                                                   |
| 26+ years       | N              | 89                                                                           | 89                                      | 89                                          | 89                                    | 89                                           | 89                                                | 89                                                          | 89                                         | 89                                                                                             | 89                                                      |
|                 | Mean           | 4.75                                                                         | 4.84                                    | 4.64                                        | 4.52                                  | 4.25                                         | 3.70                                              | 4.42                                                        | 4.17                                       | 4.37                                                                                           | 4.47                                                    |
|                 | Std. Deviation | 0.570                                                                        | 0.396                                   | 0.678                                       | 0.770                                 | 0.908                                        | 1.070                                             | 0.704                                                       | 0.829                                      | 0.681                                                                                          | 0.740                                                   |
|                 | Variance       | 0.325                                                                        | 0.157                                   | 0.460                                       | 0.593                                 | 0.825                                        | 1.146                                             | 0.496                                                       | 0.687                                      | 0.463                                                                                          | 0.547                                                   |
| Total           | N              | 387                                                                          | 387                                     | 387                                         | 387                                   | 387                                          | 387                                               | 387                                                         | 387                                        | 387                                                                                            | 387                                                     |
|                 | Mean           | 4.76                                                                         | 4.75                                    | 4.31                                        | 4.21                                  | 3.93                                         | 3.59                                              | 4.28                                                        | 3.90                                       | 4.17                                                                                           | 4.32                                                    |
|                 | Std. Deviation | 0.542                                                                        | 0.608                                   | 0.940                                       | 0.979                                 | 1.061                                        | 1.094                                             | 0.927                                                       | 1.003                                      | 0.865                                                                                          | 0.823                                                   |
|                 | Variance       | 0.294                                                                        | 0.370                                   | 0.884                                       | 0.959                                 | 1.126                                        | 1.196                                             | 0.859                                                       | 1.006                                      | 0.748                                                                                          | 0.678                                                   |
